# Supplementary material for: Nitrogen Supply and Host-Plant Genotype Modulate the Transcriptomic Profile of Plasmodiophora brassicae
Source: Front Microbiol. 2021 Jul 8;12:701067. doi: 10.3389/fmicb.2021.701067 (PMC8298192; doi:10.3389/fmicb.2021.701067)
Supplement: Supplementary Table 2 — Description of the gene subsets responsible for the driving GO-term enrichments between the N supply conditions for each time. [file Table_2.XLSX]

## Sheet: 14 dpi
S2 Table. Description of the gene subsets responsible for the driving GO-term enrichments between the N supply conditions for each time.
A. Description of the P. brassicae DEGs between N1 and N8 at 14 dpi driving the main GO-term enrichments.
BP, Biological Porcess; CC, Cellular Component; MF, Molecular Function.
GO_cat	GO.ID	GO-Term	Number of genes	P. brassicae Gene	Gene Description	P. brassicae gene expression level	P. brassicae gene expression level	P. brassicae gene expression level	P. brassicae gene expression level
						in HD N1	in HD N8	in Y N1	in Y N8
BP	GO:0008104	protein localization	2	Pldbra_eH_r1s017g08085	G_alpha_i_subunit	26.36863	40.7973	22.21132	53.16839
BP	GO:0008104	protein localization	2	Pldbra_eH_r1s026g10379	Vacuolar_sorting-associated_13	84.28748	84.58059	32.25208	83.65517
MF	GO:0003779	actin binding	2	Pldbra_eH_r1s019g08755	pectoralis_alpha_actinin	87.42315	130.02504	63.66989	119.16423
MF	GO:0003779	actin binding	2	Pldbra_eH_r1s051g12536	Putative_Cofilin	253.3569	335.1057	176.5952	300.0239

## Sheet: 27 dpi
S2 Table. Description of the gene subsets responsible for the driving GO-term enrichments between the N supply conditions for each time.
B. Description of the P. brassicae DEGs between N1 and N8 at 27 dpi driving the main GO-term enrichments.
BP, Biological Porcess; CC, Cellular Component; MF, Molecular Function.
GO_cat	GO.ID	GO-Term	Number of genes	P. brassicae Gene	Gene Description	P. brassicae gene expression level	P. brassicae gene expression level	P. brassicae gene expression level	P. brassicae gene expression level
						in HD N1	in HD N8	in Y N1	in Y N8
BP	GO:0009408	response to heat	2	Pldbra_eH_r1s005g02887	heat_shock_Ssa2_(_)	37.01614	104.68384	58.65603	107.09202
BP	GO:0009408	response to heat	2	Pldbra_eH_r1s024g10011	heat_shock_91	845.6236	1142.4185	923.8442	994.0358
BP	GO:0006366	transcription by RNA polymerase II	13	Pldbra_eH_r1s001g00146	Transcriptional_regulatory	72.33655	97.91248	70.41875	76.12046
BP	GO:0006366	transcription by RNA polymerase II	13	Pldbra_eH_r1s001g00652	transcription_factor_alpha_beta_subunit	133.7684	99.716	123.3225	129.1255
BP	GO:0006366	transcription by RNA polymerase II	13	Pldbra_eH_r1s002g00782	E2F-associated_phospho	86.5022	64.13763	77.95375	67.78291
BP	GO:0006366	transcription by RNA polymerase II	13	Pldbra_eH_r1s002g01157	DNA-directed_RNA_polymerase_II_subunit_RPB7	91.82523	67.75602	86.36205	87.09445
BP	GO:0006366	transcription by RNA polymerase II	13	Pldbra_eH_r1s004g02253	hypothetical_protein_PBRA_003422	4.526842	2.119967	12.805533	2.544953
BP	GO:0006366	transcription by RNA polymerase II	13	Pldbra_eH_r1s006g03332	DNA-directed_RNA_polymerase_and_III_subunit_RPABC5	81.39412	61.47354	97.61634	75.59803
BP	GO:0006366	transcription by RNA polymerase II	13	Pldbra_eH_r1s006g03649	transcription_elongation_factor_SPT5_isoform_X2	125.9527	174.5648	133.1516	135.891
BP	GO:0006366	transcription by RNA polymerase II	13	Pldbra_eH_r1s006g03650	transcription_elongation_factor_SPT5-like	114.33068	153.33071	93.79461	116.48042
BP	GO:0006366	transcription by RNA polymerase II	13	Pldbra_eH_r1s006g03651	hypothetical_protein_PBRA_004367	35.78969	58.6622	34.80914	41.48098
BP	GO:0006366	transcription by RNA polymerase II	13	Pldbra_eH_r1s011g05916	hypothetical_protein_PBRA_006193	142.19827	108.49392	107.38686	87.46756
BP	GO:0006366	transcription by RNA polymerase II	13	Pldbra_eH_r1s019g08950	RNA_polymerase-associated_RTF1_homolog	56.46041	76.96379	54.37353	68.11944
BP	GO:0006366	transcription by RNA polymerase II	13	Pldbra_eH_r1s025g10172	agamous-like_MADS-box_AGL27_isoform_X2	7.086442	2.34457	11.055522	10.530239
BP	GO:0006366	transcription by RNA polymerase II	13	Pldbra_eH_r1s032g11415	RNA_polymerase_II_core_subunit	144.7411	101.9104	136.5599	126.1804
BP	GO:0006694	steroid biosynthetic process	3	Pldbra_eH_r1s002g00842	Hydroxymethylglutaryl-_degradative	45.98385	64.96186	47.3809	54.67213
BP	GO:0006694	steroid biosynthetic process	3	Pldbra_eH_r1s003g01953	aldehyde_dehydrogenase_family	180.1246	117.4177	157.6093	174.4791
BP	GO:0006694	steroid biosynthetic process	3	Pldbra_eH_r1s020g09130	sterol_24-C-methyltransferase	26.72728	6.79731	25.62236	16.17791
BP	GO:0016226	iron-sulfur cluster assembly	3	Pldbra_eH_r1s008g04578	frataxin-like_domain	22.15223	13.29566	18.41399	18.22242
BP	GO:0016226	iron-sulfur cluster assembly	3	Pldbra_eH_r1s012g06290	iron_donor	45.25791	26.65268	35.08236	34.79079
BP	GO:0016226	iron-sulfur cluster assembly	3	Pldbra_eH_r1s015g07612	nifU_mitochondrial	97.94127	72.62084	88.49166	76.67813
BP	GO:0031154	culmination involved in sorocarp development	2	Pldbra_eH_r1s006g03531	DNA-binding_HORMA_domain-containing	102.13132	71.12634	80.93678	74.89795
BP	GO:0031154	culmination involved in sorocarp development	2	Pldbra_eH_r1s006g03749	chromo_domain-containing	186.1092	251.8005	178.4793	212.298
BP	GO:0031167	rRNA methylation	2	Pldbra_eH_r1s006g03495	dimethyladenosine_transferase	122.7494	92.2976	102.8574	100.9896
BP	GO:0031167	rRNA methylation	2	Pldbra_eH_r1s021g09433	ribosomal_RNA_small_subunit_methyltransferase_NEP1	249.7596	193.9511	202.229	193.8505
BP	GO:0035461	vitamin transmembrane transport	3	Pldbra_eH_r1s002g00828	hypothetical_protein_PBRA_005136	214.6849	161.2994	306.115	222.8446
BP	GO:0035461	vitamin transmembrane transport	3	Pldbra_eH_r1s002g00830	hypothetical_protein_PBRA_005137	56.24362	54.49204	20.39062	34.77502
BP	GO:0035461	vitamin transmembrane transport	3	Pldbra_eH_r1s011g06083	hypothetical_protein_PBRA_007264	14.473083	7.088925	15.242329	12.487346
BP	GO:0051726	regulation of cell cycle	7	Pldbra_eH_r1s006g03531	DNA-binding_HORMA_domain-containing	102.13132	71.12634	80.93678	74.89795
BP	GO:0051726	regulation of cell cycle	7	Pldbra_eH_r1s010g05469	cyclin-dependent_kinase_regulatory_subunit_1	92.22387	67.69066	67.79606	76.87053
BP	GO:0051726	regulation of cell cycle	7	Pldbra_eH_r1s010g05490	tRNA_pseudouridine(38-40)_synthase	121.70493	91.16829	135.34378	120.25011
BP	GO:0051726	regulation of cell cycle	7	Pldbra_eH_r1s011g05916	hypothetical_protein_PBRA_006193	142.19827	108.49392	107.38686	87.46756
BP	GO:0051726	regulation of cell cycle	7	Pldbra_eH_r1s014g06944	Metallo-dependent_phosphatase	633.3829	512.1493	595.5638	548.1729
BP	GO:0051726	regulation of cell cycle	7	Pldbra_eH_r1s017g08155	mitotic_checkpoint_serine_threonine-_kinase_BUB1_beta	238.8617	301.7783	227.2667	257.1922
BP	GO:0051726	regulation of cell cycle	7	Pldbra_eH_r1s050g12523	predicted_protein	82.62429	55.99598	75.31851	71.76351
BP	GO:0006144	purine nucleobase metabolic process	9	Pldbra_eH_r1s002g00823	ribonucleoside-diphosphate_reductase_subunit_alpha	302.0516	383.8625	268.2738	337.9707
BP	GO:0006144	purine nucleobase metabolic process	9	Pldbra_eH_r1s002g01157	DNA-directed_RNA_polymerase_II_subunit_RPB7	91.82523	67.75602	86.36205	87.09445
BP	GO:0006144	purine nucleobase metabolic process	9	Pldbra_eH_r1s003g01887	adenylate_kinase	290.2094	362.3965	241.4298	267.5088
BP	GO:0006144	purine nucleobase metabolic process	9	Pldbra_eH_r1s004g02300	Adenylate_kinase	93.09882	66.19908	89.40094	87.66193
BP	GO:0006144	purine nucleobase metabolic process	9	Pldbra_eH_r1s005g02948	DNA-directed_RNA_polymerase_II_subunit_4-like	99.21759	68.58546	88.49057	87.65125
BP	GO:0006144	purine nucleobase metabolic process	9	Pldbra_eH_r1s006g03332	DNA-directed_RNA_polymerase_and_III_subunit_RPABC5	81.39412	61.47354	97.61634	75.59803
BP	GO:0006144	purine nucleobase metabolic process	9	Pldbra_eH_r1s006g03690	DNA-directed_RNA_polymerase_I_subunit_RPA43	151.6461	111.6326	149.4529	116.0156
BP	GO:0006144	purine nucleobase metabolic process	9	Pldbra_eH_r1s009g05050	hypothetical_protein_PBRA_000259	64.11467	94.7392	52.77586	71.78373
BP	GO:0006144	purine nucleobase metabolic process	9	Pldbra_eH_r1s016g07841	purine-nucleoside_phosphorylase	0.450432	2.839231	5.950238	5.159075
BP	GO:0006457	protein folding	8	Pldbra_eH_r1s003g01626	heat_shock_80	3886.822	4969.322	4471.249	4805.818
BP	GO:0006457	protein folding	8	Pldbra_eH_r1s004g02641	with_DNJ1_SIS1	25.05015	12.97721	24.54486	18.51719
BP	GO:0006457	protein folding	8	Pldbra_eH_r1s010g05582	tubulin-specific_chaperone_C	58.38214	38.52618	58.06002	51.52979
BP	GO:0006457	protein folding	8	Pldbra_eH_r1s012g06525	peptidyl-prolyl_cis-trans_isomerase-like_1	120.41144	88.2761	110.66641	91.27494
BP	GO:0006457	protein folding	8	Pldbra_eH_r1s018g08656	heat_shock_hsp90	530.4212	769.4602	535.7977	648.4222
BP	GO:0006457	protein folding	8	Pldbra_eH_r1s028g10761	heat_shock_90	1072.2736	2073.6452	879.4165	1344.5811
BP	GO:0006457	protein folding	8	Pldbra_eH_r1s041g12147	chaperonin_CPN60-2;_mitochondrial	2802.597	4264.365	3458.444	3933.97
BP	GO:0006457	protein folding	8	Pldbra_eH_r1s047g12404	calnexin_precursor	599.6592	841.2127	666.3335	792.6133
BP	GO:0000413	protein peptidyl-prolyl isomerization	5	Pldbra_eH_r1s010g05682	peptidyl-prolyl_cis-trans_isomerase_Pin1	77.53006	55.62695	68.43084	57.75274
BP	GO:0000413	protein peptidyl-prolyl isomerization	5	Pldbra_eH_r1s012g06525	peptidyl-prolyl_cis-trans_isomerase-like_1	120.41144	88.2761	110.66641	91.27494
BP	GO:0000413	protein peptidyl-prolyl isomerization	5	Pldbra_eH_r1s018g08642	peptidylprolyl_cis-trans_FKBP-type_domain_containing	482.9085	658.7567	448.2325	529.2075
BP	GO:0000413	protein peptidyl-prolyl isomerization	5	Pldbra_eH_r1s019g08775	peptidyl-prolyl_cis-trans_isomerase_(cyclophilin-_40)	244.1848	179.362	237.1941	213.2135
BP	GO:0000413	protein peptidyl-prolyl isomerization	5	Pldbra_eH_r1s022g09660	FKBP-type_peptidyl-prolyl_cis-trans_isomerase	250.3025	373.9831	178.7659	293.3541
BP	GO:0030488	tRNA methylation	3	Pldbra_eH_r1s009g04996	tRNA_(guanine(37)-N1)-methyltransferase	58.65028	42.1788	60.6402	59.43691
BP	GO:0030488	tRNA methylation	3	Pldbra_eH_r1s023g09704	tRNA_(adenineN(1))methyltransferase_noncatalytic_subunit_trm6	92.73856	64.02805	84.3031	76.81487
BP	GO:0030488	tRNA methylation	3	Pldbra_eH_r1s024g10028	multisite-specific_tRNA:(cytosine-C5)-methyltransferase	149.3682	197.9817	123.05	155.8395
BP	GO:0007094	mitotic spindle assembly checkpoint	3	Pldbra_eH_r1s006g03531	DNA-binding_HORMA_domain-containing	102.13132	71.12634	80.93678	74.89795
BP	GO:0007094	mitotic spindle assembly checkpoint	3	Pldbra_eH_r1s014g06944	Metallo-dependent_phosphatase	633.3829	512.1493	595.5638	548.1729
BP	GO:0007094	mitotic spindle assembly checkpoint	3	Pldbra_eH_r1s017g08155	mitotic_checkpoint_serine_threonine-_kinase_BUB1_beta	238.8617	301.7783	227.2667	257.1922
BP	GO:0006473	protein acetylation	3	Pldbra_eH_r1s006g03801	WD_repeat-containing_5	119.61909	86.70694	126.47281	111.46648
BP	GO:0006473	protein acetylation	3	Pldbra_eH_r1s017g08108	N-alpha-acetyltransferase_30-like	90.27841	65.13803	79.77417	71.23
BP	GO:0006473	protein acetylation	3	Pldbra_eH_r1s024g10017	N-alpha-acetyltransferase_catalytic_subunit	58.97793	42.48476	59.49682	52.84914
BP	GO:0032784	regulation of DNA-templated transcription, elongation	4	Pldbra_eH_r1s002g00782	E2F-associated_phospho	86.5022	64.13763	77.95375	67.78291
BP	GO:0032784	regulation of DNA-templated transcription, elongation	4	Pldbra_eH_r1s006g03649	transcription_elongation_factor_SPT5_isoform_X2	125.9527	174.5648	133.1516	135.891
BP	GO:0032784	regulation of DNA-templated transcription, elongation	4	Pldbra_eH_r1s006g03650	transcription_elongation_factor_SPT5-like	114.33068	153.33071	93.79461	116.48042
BP	GO:0032784	regulation of DNA-templated transcription, elongation	4	Pldbra_eH_r1s006g03651	hypothetical_protein_PBRA_004367	35.78969	58.6622	34.80914	41.48098
CC	GO:0005681	spliceosomal complex	5	Pldbra_eH_r1s002g00898	U6_snRNA-associated_Sm_LSm6	103.89331	72.20638	99.42792	91.72556
CC	GO:0005681	spliceosomal complex	5	Pldbra_eH_r1s008g04545	RNA_binding	31.74413	18.90365	27.96222	33.7923
CC	GO:0005681	spliceosomal complex	5	Pldbra_eH_r1s012g06525	peptidyl-prolyl_cis-trans_isomerase-like_1	120.41144	88.2761	110.66641	91.27494
CC	GO:0005681	spliceosomal complex	5	Pldbra_eH_r1s047g12423	pre-mRNA-processing-splicing_factor_8	585.381	810.156	571.934	638.9943
CC	GO:0005681	spliceosomal complex	5	Pldbra_eH_r1s053g12569	protein_BUD31_homolog	95.7105	71.6903	94.60096	86.04452
CC	GO:0005666	RNA polymerase III complex	2	Pldbra_eH_r1s006g03332	DNA-directed_RNA_polymerase_and_III_subunit_RPABC5	81.39412	61.47354	97.61634	75.59803
CC	GO:0005666	RNA polymerase III complex	2	Pldbra_eH_r1s032g11415	RNA_polymerase_II_core_subunit	144.7411	101.9104	136.5599	126.1804
CC	GO:0005730	nucleolus	11	Pldbra_eH_r1s002g00898	U6_snRNA-associated_Sm_LSm6	103.89331	72.20638	99.42792	91.72556
CC	GO:0005730	nucleolus	11	Pldbra_eH_r1s002g01157	DNA-directed_RNA_polymerase_II_subunit_RPB7	91.82523	67.75602	86.36205	87.09445
CC	GO:0005730	nucleolus	11	Pldbra_eH_r1s003g01825	hypothetical_protein_PBRA_003108	68.69651	50.18853	47.39473	52.37449
CC	GO:0005730	nucleolus	11	Pldbra_eH_r1s005g02948	DNA-directed_RNA_polymerase_II_subunit_4-like	99.21759	68.58546	88.49057	87.65125
CC	GO:0005730	nucleolus	11	Pldbra_eH_r1s006g03332	DNA-directed_RNA_polymerase_and_III_subunit_RPABC5	81.39412	61.47354	97.61634	75.59803
CC	GO:0005730	nucleolus	11	Pldbra_eH_r1s006g03690	DNA-directed_RNA_polymerase_I_subunit_RPA43	151.6461	111.6326	149.4529	116.0156
CC	GO:0005730	nucleolus	11	Pldbra_eH_r1s016g07890	unconventional_myosin-VIIa_isoform_X2	72.62592	96.80149	68.81865	87.048
CC	GO:0005730	nucleolus	11	Pldbra_eH_r1s018g08642	peptidylprolyl_cis-trans_FKBP-type_domain_containing	482.9085	658.7567	448.2325	529.2075
CC	GO:0005730	nucleolus	11	Pldbra_eH_r1s021g09433	ribosomal_RNA_small_subunit_methyltransferase_NEP1	249.7596	193.9511	202.229	193.8505
CC	GO:0005730	nucleolus	11	Pldbra_eH_r1s032g11415	RNA_polymerase_II_core_subunit	144.7411	101.9104	136.5599	126.1804
CC	GO:0005730	nucleolus	11	Pldbra_eH_r1s083g12759	RNA_cytidine_acetyltransferase	136.8314	189.2422	121.1526	144.1432
CC	GO:0000786	nucleosome	4	Pldbra_eH_r1s002g01334	histone_h4	23.39946	11.90406	20.65414	12.63882
CC	GO:0000786	nucleosome	4	Pldbra_eH_r1s014g07164	histone_h4	34.13763	16.36267	28.13706	22.66035
CC	GO:0000786	nucleosome	4	Pldbra_eH_r1s015g07573	histone_H2B	177.0088	112.6346	159.1919	119.7223
CC	GO:0000786	nucleosome	4	Pldbra_eH_r1s022g09605	histone_H2B	73.34331	39.1301	88.48289	39.8668
CC	GO:0031248	protein acetyltransferase complex	3	Pldbra_eH_r1s006g03801	WD_repeat-containing_5	119.61909	86.70694	126.47281	111.46648
CC	GO:0031248	protein acetyltransferase complex	3	Pldbra_eH_r1s017g08108	N-alpha-acetyltransferase_30-like	90.27841	65.13803	79.77417	71.23
CC	GO:0031248	protein acetyltransferase complex	3	Pldbra_eH_r1s024g10017	N-alpha-acetyltransferase_catalytic_subunit	58.97793	42.48476	59.49682	52.84914
CC	GO:0005665	RNA polymerase II, core complex	3	Pldbra_eH_r1s002g01157	DNA-directed_RNA_polymerase_II_subunit_RPB7	91.82523	67.75602	86.36205	87.09445
CC	GO:0005665	RNA polymerase II, core complex	3	Pldbra_eH_r1s006g03332	DNA-directed_RNA_polymerase_and_III_subunit_RPABC5	81.39412	61.47354	97.61634	75.59803
CC	GO:0005665	RNA polymerase II, core complex	3	Pldbra_eH_r1s032g11415	RNA_polymerase_II_core_subunit	144.7411	101.9104	136.5599	126.1804
CC	GO:0000790	nuclear chromatin	5	Pldbra_eH_r1s002g01334	histone_h4	23.39946	11.90406	20.65414	12.63882
CC	GO:0000790	nuclear chromatin	5	Pldbra_eH_r1s006g03678	DNA_helicase_INO80	139.5231	182.8508	144.0467	154.2327
CC	GO:0000790	nuclear chromatin	5	Pldbra_eH_r1s009g04939	DNA_repair_SWI5_homolog	21.673571	9.730717	19.206379	16.772019
CC	GO:0000790	nuclear chromatin	5	Pldbra_eH_r1s014g06944	Metallo-dependent_phosphatase	633.3829	512.1493	595.5638	548.1729
CC	GO:0000790	nuclear chromatin	5	Pldbra_eH_r1s014g07164	histone_h4	34.13763	16.36267	28.13706	22.66035
MF	GO:0008417	fucosyltransferase activity	2	Pldbra_eH_r1s008g04419	alpha_1;3_fucosyltransferase	26.6261	40.70147	31.09985	33.04934
MF	GO:0008417	fucosyltransferase activity	2	Pldbra_eH_r1s011g06005	bifunctional_glycosyltransferase	63.34072	44.33296	56.9302	51.82078
MF	GO:0019901	protein kinase binding	2	Pldbra_eH_r1s027g10610	translational_activator_GCN1	407.7398	538.0613	381.8462	429.5777
MF	GO:0019901	protein kinase binding	2	Pldbra_eH_r1s050g12523	predicted_protein	82.62429	55.99598	75.31851	71.76351
MF	GO:0016894	endonuclease activity, active with either ribo- or deoxyribonucleic acids and producing 3'-phos...	2	Pldbra_eH_r1s001g00607	tRNA-splicing_endonuclease_subunit_Sen15-like	40.75213	26.02988	37.11499	35.34038
MF	GO:0016894	endonuclease activity, active with either ribo- or deoxyribonucleic acids and producing 3'-phos...	2	Pldbra_eH_r1s012g06357	tRNA-splicing_endonuclease_subunit_Sen34-like_isoform_X2	41.27123	26.6851	45.97098	39.30688
MF	GO:0004017	adenylate kinase activity	2	Pldbra_eH_r1s003g01887	adenylate_kinase	290.2094	362.3965	241.4298	267.5088
MF	GO:0004017	adenylate kinase activity	2	Pldbra_eH_r1s004g02300	Adenylate_kinase	93.09882	66.19908	89.40094	87.66193
MF	GO:0008649	rRNA methyltransferase activity	2	Pldbra_eH_r1s006g03495	dimethyladenosine_transferase	122.7494	92.2976	102.8574	100.9896
MF	GO:0008649	rRNA methyltransferase activity	2	Pldbra_eH_r1s021g09433	ribosomal_RNA_small_subunit_methyltransferase_NEP1	249.7596	193.9511	202.229	193.8505
MF	GO:0004549	tRNA-specific ribonuclease activity	2	Pldbra_eH_r1s001g00607	tRNA-splicing_endonuclease_subunit_Sen15-like	40.75213	26.02988	37.11499	35.34038
MF	GO:0004549	tRNA-specific ribonuclease activity	2	Pldbra_eH_r1s012g06357	tRNA-splicing_endonuclease_subunit_Sen34-like_isoform_X2	41.27123	26.6851	45.97098	39.30688
MF	GO:0008173	RNA methyltransferase activity	6	Pldbra_eH_r1s006g03495	dimethyladenosine_transferase	122.7494	92.2976	102.8574	100.9896
MF	GO:0008173	RNA methyltransferase activity	6	Pldbra_eH_r1s007g03914	23S_rRNA_methyltransferase	63.03197	44.70333	60.22008	54.83487
MF	GO:0008173	RNA methyltransferase activity	6	Pldbra_eH_r1s009g04996	tRNA_(guanine(37)-N1)-methyltransferase	58.65028	42.1788	60.6402	59.43691
MF	GO:0008173	RNA methyltransferase activity	6	Pldbra_eH_r1s011g05924	Trimethylguanosine_synthase	117.43516	90.13579	118.20755	107.64693
MF	GO:0008173	RNA methyltransferase activity	6	Pldbra_eH_r1s021g09433	ribosomal_RNA_small_subunit_methyltransferase_NEP1	249.7596	193.9511	202.229	193.8505
MF	GO:0008173	RNA methyltransferase activity	6	Pldbra_eH_r1s024g10028	multisite-specific_tRNA:(cytosine-C5)-methyltransferase	149.3682	197.9817	123.05	155.8395
MF	GO:0003779	actin binding	6	Pldbra_eH_r1s004g02472	WH1_domain_containing	62.36387	90.90221	61.70206	80.00881
MF	GO:0003779	actin binding	6	Pldbra_eH_r1s005g03179	myosin_VIIA	8.301614	15.714417	11.847565	15.82922
MF	GO:0003779	actin binding	6	Pldbra_eH_r1s010g05463	hypothetical_protein_PBRA_000937	78.87017	110.13608	71.89698	90.47254
MF	GO:0003779	actin binding	6	Pldbra_eH_r1s010g05731	formin-homology_2_domain-containing	217.7487	289.5642	164.8238	197.6265
MF	GO:0003779	actin binding	6	Pldbra_eH_r1s016g07890	unconventional_myosin-VIIa_isoform_X2	72.62592	96.80149	68.81865	87.048
MF	GO:0003779	actin binding	6	Pldbra_eH_r1s051g12536	Putative_Cofilin	247.4613	306.0658	244.4521	260.0495
MF	GO:0004407	histone deacetylase activity	2	Pldbra_eH_r1s001g00146	Transcriptional_regulatory	72.33655	97.91248	70.41875	76.12046
MF	GO:0004407	histone deacetylase activity	2	Pldbra_eH_r1s007g04219	WD40_repeat-containing	4.69249	1.02549	4.821614	1.798601
MF	GO:0090482	vitamin transmembrane transporter activity	3	Pldbra_eH_r1s002g00828	hypothetical_protein_PBRA_005136	214.6849	161.2994	306.115	222.8446
MF	GO:0090482	vitamin transmembrane transporter activity	3	Pldbra_eH_r1s002g00830	hypothetical_protein_PBRA_005137	56.24362	54.49204	20.39062	34.77502
MF	GO:0090482	vitamin transmembrane transporter activity	3	Pldbra_eH_r1s011g06083	hypothetical_protein_PBRA_007264	14.473083	7.088925	15.242329	12.487346
MF	GO:0042393	histone binding	3	Pldbra_eH_r1s002g01334	histone_h4	23.39946	11.90406	20.65414	12.63882
MF	GO:0042393	histone binding	3	Pldbra_eH_r1s014g07164	histone_h4	34.13763	16.36267	28.13706	22.66035
MF	GO:0042393	histone binding	3	Pldbra_eH_r1s029g10927	Proteasome_activator_subunit_4	79.20083	107.54156	97.07447	94.91372
MF	GO:0003755	peptidyl-prolyl cis-trans isomerase activity	5	Pldbra_eH_r1s010g05682	peptidyl-prolyl_cis-trans_isomerase_Pin1	77.53006	55.62695	68.43084	57.75274
MF	GO:0003755	peptidyl-prolyl cis-trans isomerase activity	5	Pldbra_eH_r1s012g06525	peptidyl-prolyl_cis-trans_isomerase-like_1	120.41144	88.2761	110.66641	91.27494
MF	GO:0003755	peptidyl-prolyl cis-trans isomerase activity	5	Pldbra_eH_r1s018g08642	peptidylprolyl_cis-trans_FKBP-type_domain_containing	482.9085	658.7567	448.2325	529.2075
MF	GO:0003755	peptidyl-prolyl cis-trans isomerase activity	5	Pldbra_eH_r1s019g08775	peptidyl-prolyl_cis-trans_isomerase_(cyclophilin-_40)	244.1848	179.362	237.1941	213.2135
MF	GO:0003755	peptidyl-prolyl cis-trans isomerase activity	5	Pldbra_eH_r1s022g09660	FKBP-type_peptidyl-prolyl_cis-trans_isomerase	250.3025	373.9831	178.7659	293.3541
MF	GO:0034212	peptide N-acetyltransferase activity	3	Pldbra_eH_r1s006g03801	WD_repeat-containing_5	119.61909	86.70694	126.47281	111.46648
MF	GO:0034212	peptide N-acetyltransferase activity	3	Pldbra_eH_r1s017g08108	N-alpha-acetyltransferase_30-like	90.27841	65.13803	79.77417	71.23
MF	GO:0034212	peptide N-acetyltransferase activity	3	Pldbra_eH_r1s024g10017	N-alpha-acetyltransferase_catalytic_subunit	58.97793	42.48476	59.49682	52.84914
MF	GO:0051082	unfolded protein binding	6	Pldbra_eH_r1s003g01626	heat_shock_80	3886.822	4969.322	4471.249	4805.818
MF	GO:0051082	unfolded protein binding	6	Pldbra_eH_r1s004g02641	with_DNJ1_SIS1	25.05015	12.97721	24.54486	18.51719
MF	GO:0051082	unfolded protein binding	6	Pldbra_eH_r1s005g02887	heat_shock_Ssa2_(_)	37.01614	104.68384	58.65603	107.09202
MF	GO:0051082	unfolded protein binding	6	Pldbra_eH_r1s018g08656	heat_shock_hsp90	530.4212	769.4602	535.7977	648.4222
MF	GO:0051082	unfolded protein binding	6	Pldbra_eH_r1s028g10761	heat_shock_90	1072.2736	2073.6452	879.4165	1344.5811
MF	GO:0051082	unfolded protein binding	6	Pldbra_eH_r1s047g12404	calnexin_precursor	599.6592	841.2127	666.3335	792.6133

## Sheet: 42 dpi
S2 Table. Description of the gene subsets responsible for the driving GO-term enrichments between the N supply conditions for each time.
C. Description of the P. brassicae DEGs between N1 and N8 at 42 dpi driving the main GO-term enrichments.
BP, Biological Porcess; CC, Cellular Component; MF, Molecular Function.
GO_cat	GO.ID	GO-Term	Number of genes	P. brassicae Gene	Gene Description	P. brassicae gene expression level	P. brassicae gene expression level	P. brassicae gene expression level	P. brassicae gene expression level
						in HD N1	in HD N8	in Y N1	in Y N8
BP	GO:0009099	valine biosynthetic process	2	Pldbra_eH_r1s011g06069	pyruvate_dehydrogenase_E1_component_subunit_mitochondrial-like	116.8466	124.0781	104.6157	135.0951
BP	GO:0009099	valine biosynthetic process	2	Pldbra_eH_r1s011g06080	valyl-tRNA_synthetase	485.459	503.1881	365.1554	498.6699
BP	GO:0009098	leucine biosynthetic process	2	Pldbra_eH_r1s011g06069	pyruvate_dehydrogenase_E1_component_subunit_mitochondrial-like	116.8466	124.0781	104.6157	135.0951
BP	GO:0009098	leucine biosynthetic process	2	Pldbra_eH_r1s011g06080	valyl-tRNA_synthetase	485.459	503.1881	365.1554	498.6699
BP	GO:0006334	nucleosome assembly	2	Pldbra_eH_r1s004g02438	hypothetical_protein_PBRA_003271	387.0913	392.7783	286.4329	387.5484
BP	GO:0006334	nucleosome assembly	2	Pldbra_eH_r1s009g05217	histone_H1	136.50271	121.52362	59.34258	111.47003
BP	GO:0000154	rRNA modification	2	Pldbra_eH_r1s013g06611	nucleolar_NOP5	359.8564	391.2835	257.8495	405.3555
BP	GO:0000154	rRNA modification	2	Pldbra_eH_r1s021g09305	nucleolar_56-like	549.3704	617.6538	369.1916	639.3747
BP	GO:0035461	vitamin transmembrane transport	2	Pldbra_eH_r1s002g00828	hypothetical_protein_PBRA_005136	271.6475	231.5417	482.5417	326.91
BP	GO:0035461	vitamin transmembrane transport	2	Pldbra_eH_r1s002g00829	hypothetical_protein_PBRA_005137	49.06167	34.18932	76.23376	47.97423
BP	GO:0071897	DNA biosynthetic process	3	Pldbra_eH_r1s001g00758	DNA_ligase_1-like_isoform_X2	280.8814	304.9951	246.2001	321.6016
BP	GO:0071897	DNA biosynthetic process	3	Pldbra_eH_r1s012g06563	DNA_polymerase_epsilon_catalytic_subunit_A_[Wallemia_mellicola_CBS_]	395.6284	503.1761	361.9632	501.1752
BP	GO:0071897	DNA biosynthetic process	3	Pldbra_eH_r1s021g09377	hypothetical_protein_PBRA_006300	41.58851	48.78115	29.94078	48.62339
BP	GO:0000902	cell morphogenesis	2	Pldbra_eH_r1s016g07890	unconventional_myosin-VIIa_isoform_X2	111.91878	150.23054	93.31825	143.64262
BP	GO:0000902	cell morphogenesis	2	Pldbra_eH_r1s021g09268	cytoplasmic_FMR1-interacting_1_homolog	261.6926	331.1906	203.5207	295.7896
BP	GO:0000280	nuclear division	4	Pldbra_eH_r1s006g03512	condensin_complex_subunit_1_isoform_X2	172.7255	223.3383	156.5262	213.9288
BP	GO:0000280	nuclear division	4	Pldbra_eH_r1s008g04583	cohesin_complex_subunit_psm1	1356.367	1456.092	1115.922	1568.126
BP	GO:0000280	nuclear division	4	Pldbra_eH_r1s015g07561	eukaryotic_rRNA_processing	293.7115	293.4901	197.1922	323.1065
BP	GO:0000280	nuclear division	4	Pldbra_eH_r1s018g08524	homologous-pairing_2_homolog	133.95927	124.23813	92.72419	151.72167
BP	GO:0060271	cilium assembly	4	Pldbra_eH_r1s001g00331	centrosomal_of_290_kDa_isoform_X5	411.7429	407.3718	243.7743	412.3243
BP	GO:0060271	cilium assembly	4	Pldbra_eH_r1s001g00472	kinesin-II_95_kDa_subunit-like	42.92766	44.55869	30.01177	48.32645
BP	GO:0060271	cilium assembly	4	Pldbra_eH_r1s003g01580	bardet-Biedl_syndrome_1_family	3.3235063	2.4249367	3.008444	0.6482436
BP	GO:0060271	cilium assembly	4	Pldbra_eH_r1s011g06111	kinesin_family_member_3B	64.58478	76.94789	58.95341	81.39925
BP	GO:0051276	chromosome organization	10	Pldbra_eH_r1s001g00618	DNA_topoisomerase_1_beta	263.7577	258.3898	187.0081	279.8385
BP	GO:0051276	chromosome organization	10	Pldbra_eH_r1s003g01518	ATP-dependent_DNA_helicase_Q-like_4A	109.64992	131.13265	99.49351	140.08005
BP	GO:0051276	chromosome organization	10	Pldbra_eH_r1s004g02438	hypothetical_protein_PBRA_003271	387.0913	392.7783	286.4329	387.5484
BP	GO:0051276	chromosome organization	10	Pldbra_eH_r1s006g03421	structural_maintenance_of_chromosomes_4	433.448	423.7059	324.22	457.652
BP	GO:0051276	chromosome organization	10	Pldbra_eH_r1s006g03512	condensin_complex_subunit_1_isoform_X2	172.7255	223.3383	156.5262	213.9288
BP	GO:0051276	chromosome organization	10	Pldbra_eH_r1s008g04583	cohesin_complex_subunit_psm1	1356.367	1456.092	1115.922	1568.126
BP	GO:0051276	chromosome organization	10	Pldbra_eH_r1s009g05217	histone_H1	136.50271	121.52362	59.34258	111.47003
BP	GO:0051276	chromosome organization	10	Pldbra_eH_r1s017g08223	regulator_of_telomere_elongation_helicase_1	81.93851	95.02286	68.49336	105.91474
BP	GO:0051276	chromosome organization	10	Pldbra_eH_r1s018g08642	peptidylprolyl_cis-trans_FKBP-type_domain_containing	483.0791	579.9841	452.1255	664.0158
BP	GO:0051276	chromosome organization	10	Pldbra_eH_r1s022g09530	structural_maintenance_of_chromosomes_flexible_hinge_domain-containing_1	365.0314	484.3175	334.1612	468.051
BP	GO:0006310	DNA recombination	6	Pldbra_eH_r1s001g00087	structural_maintenance_of_chromosomes_6-like	517.8063	526.5667	386.5766	558.0435
BP	GO:0006310	DNA recombination	6	Pldbra_eH_r1s001g00758	DNA_ligase_1-like_isoform_X2	280.8814	304.9951	246.2001	321.6016
BP	GO:0006310	DNA recombination	6	Pldbra_eH_r1s003g01518	ATP-dependent_DNA_helicase_Q-like_4A	109.64992	131.13265	99.49351	140.08005
BP	GO:0006310	DNA recombination	6	Pldbra_eH_r1s010g05752	ATP-dependent_DNA_helicase_Q-like_3	73.66708	76.13579	62.0404	82.43467
BP	GO:0006310	DNA recombination	6	Pldbra_eH_r1s014g07146	Rad52_22_double-strand_break_repair	73.43645	88.94463	43.88001	96.57362
BP	GO:0006310	DNA recombination	6	Pldbra_eH_r1s018g08524	homologous-pairing_2_homolog	133.95927	124.23813	92.72419	151.72167
BP	GO:0042147	retrograde transport, endosome to Golgi	2	Pldbra_eH_r1s014g07144	trafficking_particle_complex_subunit	90.07805	94.47326	64.88606	97.79312
BP	GO:0042147	retrograde transport, endosome to Golgi	2	Pldbra_eH_r1s045g12337	vacuolar_protein_sorting-associated_protein_35B	209.8931	246.4511	175.2461	230.4909
BP	GO:0006085	acetyl-CoA biosynthetic process	2	Pldbra_eH_r1s011g06069	pyruvate_dehydrogenase_E1_component_subunit_mitochondrial-like	116.8466	124.0781	104.6157	135.0951
BP	GO:0006085	acetyl-CoA biosynthetic process	2	Pldbra_eH_r1s026g10472	ATP-citrate_synthase	478.1523	626.8508	438.3937	604.2043
BP	GO:0006260	DNA replication	8	Pldbra_eH_r1s001g00758	DNA_ligase_1-like_isoform_X2	280.8814	304.9951	246.2001	321.6016
BP	GO:0006260	DNA replication	8	Pldbra_eH_r1s002g00823	ribonucleoside-diphosphate_reductase_subunit_alpha	328.1795	391.4034	258.5874	363.8981
BP	GO:0006260	DNA replication	8	Pldbra_eH_r1s003g01518	ATP-dependent_DNA_helicase_Q-like_4A	109.64992	131.13265	99.49351	140.08005
BP	GO:0006260	DNA replication	8	Pldbra_eH_r1s003g01523	MCM10_homolog	57.74432	57.39831	47.31193	65.92599
BP	GO:0006260	DNA replication	8	Pldbra_eH_r1s012g06563	DNA_polymerase_epsilon_catalytic_subunit_A_[Wallemia_mellicola_CBS_]	395.6284	503.1761	361.9632	501.1752
BP	GO:0006260	DNA replication	8	Pldbra_eH_r1s021g09377	hypothetical_protein_PBRA_006300	41.58851	48.78115	29.94078	48.62339
BP	GO:0006260	DNA replication	8	Pldbra_eH_r1s025g10335	DNA_replication_ATP-dependent_helicase_nuclease_DNA2_isoform_X1	104.3699	125.0366	103.1779	141.0272
BP	GO:0006260	DNA replication	8	Pldbra_eH_r1s033g11492	DNA_replication_licensing_factor_MCM3	275.1997	298.7308	213.7808	294.389
BP	GO:0007018	microtubule-based movement	10	Pldbra_eH_r1s001g00021	sporangia_induced_dynein_heavy_chain	99.53773	148.38009	99.0225	138.13832
BP	GO:0007018	microtubule-based movement	10	Pldbra_eH_r1s001g00472	kinesin-II_95_kDa_subunit-like	42.92766	44.55869	30.01177	48.32645
BP	GO:0007018	microtubule-based movement	10	Pldbra_eH_r1s002g00945	dynein_heavy_chain	361.5558	480.3879	255.5155	445.772
BP	GO:0007018	microtubule-based movement	10	Pldbra_eH_r1s011g06111	kinesin_family_member_3B	64.58478	76.94789	58.95341	81.39925
BP	GO:0007018	microtubule-based movement	10	Pldbra_eH_r1s012g06267	hypothetical_protein_PBRA_004927	60.54464	61.39965	35.2168	55.21601
BP	GO:0007018	microtubule-based movement	10	Pldbra_eH_r1s012g06374	dynein_heavy_chain	122.08293	167.91741	85.03599	146.1115
BP	GO:0007018	microtubule-based movement	10	Pldbra_eH_r1s015g07419	motor_domain-containing	91.10568	96.20659	42.3887	93.37256
BP	GO:0007018	microtubule-based movement	10	Pldbra_eH_r1s016g07890	unconventional_myosin-VIIa_isoform_X2	111.91878	150.23054	93.31825	143.64262
BP	GO:0007018	microtubule-based movement	10	Pldbra_eH_r1s019g08786	hypothetical_protein_PBRA_002047	339.9224	434.8418	260.1893	401.3144
BP	GO:0007018	microtubule-based movement	10	Pldbra_eH_r1s035g11650	kinesin_KIN-5A	134.2809	152.0596	118.0152	165.1471
CC	GO:0005732	small nucleolar ribonucleoprotein complex	2	Pldbra_eH_r1s013g06611	nucleolar_NOP5	359.8564	391.2835	257.8495	405.3555
CC	GO:0005732	small nucleolar ribonucleoprotein complex	2	Pldbra_eH_r1s021g09305	nucleolar_56-like	549.3704	617.6538	369.1916	639.3747
CC	GO:0005694	chromosome	11	Pldbra_eH_r1s001g00087	structural_maintenance_of_chromosomes_6-like	517.8063	526.5667	386.5766	558.0435
CC	GO:0005694	chromosome	11	Pldbra_eH_r1s001g00618	DNA_topoisomerase_1_beta	263.7577	258.3898	187.0081	279.8385
CC	GO:0005694	chromosome	11	Pldbra_eH_r1s003g01518	ATP-dependent_DNA_helicase_Q-like_4A	109.64992	131.13265	99.49351	140.08005
CC	GO:0005694	chromosome	11	Pldbra_eH_r1s004g02438	hypothetical_protein_PBRA_003271	387.0913	392.7783	286.4329	387.5484
CC	GO:0005694	chromosome	11	Pldbra_eH_r1s006g03421	structural_maintenance_of_chromosomes_4	433.448	423.7059	324.22	457.652
CC	GO:0005694	chromosome	11	Pldbra_eH_r1s008g04583	cohesin_complex_subunit_psm1	1356.367	1456.092	1115.922	1568.126
CC	GO:0005694	chromosome	11	Pldbra_eH_r1s009g05217	histone_H1	136.50271	121.52362	59.34258	111.47003
CC	GO:0005694	chromosome	11	Pldbra_eH_r1s012g06563	DNA_polymerase_epsilon_catalytic_subunit_A_[Wallemia_mellicola_CBS_]	395.6284	503.1761	361.9632	501.1752
CC	GO:0005694	chromosome	11	Pldbra_eH_r1s017g08223	regulator_of_telomere_elongation_helicase_1	81.93851	95.02286	68.49336	105.91474
CC	GO:0005694	chromosome	11	Pldbra_eH_r1s022g09530	structural_maintenance_of_chromosomes_flexible_hinge_domain-containing_1	365.0314	484.3175	334.1612	468.051
CC	GO:0005694	chromosome	11	Pldbra_eH_r1s040g12078	putative_nipped-b-like_protein_(delangin)_(scc2_homolog)	75.50419	92.77159	55.56698	90.4356
CC	GO:0009365	protein histidine kinase complex	3	Pldbra_eH_r1s008g04773	adenylyl	54.00482	65.04536	46.30565	69.19634
CC	GO:0009365	protein histidine kinase complex	3	Pldbra_eH_r1s010g05679	PAS_domain_S-box	102.64311	129.11054	83.56619	136.46353
CC	GO:0009365	protein histidine kinase complex	3	Pldbra_eH_r1s028g10816	multi-sensor_hybrid_histidine_kinase_[Nitrosospira_lacus]	3.42489	3.194315	1.752945	4.958891
CC	GO:0097014	ciliary plasm	2	Pldbra_eH_r1s011g06111	kinesin_family_member_3B	64.58478	76.94789	58.95341	81.39925
CC	GO:0097014	ciliary plasm	2	Pldbra_eH_r1s019g08786	hypothetical_protein_PBRA_002047	339.9224	434.8418	260.1893	401.3144
CC	GO:0005871	kinesin complex	2	Pldbra_eH_r1s001g00472	kinesin-II_95_kDa_subunit-like	42.92766	44.55869	30.01177	48.32645
CC	GO:0005871	kinesin complex	2	Pldbra_eH_r1s011g06111	kinesin_family_member_3B	64.58478	76.94789	58.95341	81.39925
CC	GO:0005813	centrosome	2	Pldbra_eH_r1s001g00301	rotatin_isoform_X3	45.31669	60.02331	36.50053	55.8973
CC	GO:0005813	centrosome	2	Pldbra_eH_r1s001g00331	centrosomal_of_290_kDa_isoform_X5	411.7429	407.3718	243.7743	412.3243
CC	GO:0005891	voltage-gated calcium channel complex	2	Pldbra_eH_r1s004g02391	hypothetical_protein_PBRA_003307	25.75107	31.62514	16.38552	29.41019
CC	GO:0005891	voltage-gated calcium channel complex	2	Pldbra_eH_r1s008g04638	two_pore_calcium_channel_2-like	7.143215	5.622293	4.443868	1.348649
CC	GO:0120025	plasma membrane bounded cell projection	6	Pldbra_eH_r1s001g00301	rotatin_isoform_X3	45.31669	60.02331	36.50053	55.8973
CC	GO:0120025	plasma membrane bounded cell projection	6	Pldbra_eH_r1s003g01580	bardet-Biedl_syndrome_1_family	3.3235063	2.4249367	3.008444	0.6482436
CC	GO:0120025	plasma membrane bounded cell projection	6	Pldbra_eH_r1s011g06111	kinesin_family_member_3B	64.58478	76.94789	58.95341	81.39925
CC	GO:0120025	plasma membrane bounded cell projection	6	Pldbra_eH_r1s016g07890	unconventional_myosin-VIIa_isoform_X2	111.91878	150.23054	93.31825	143.64262
CC	GO:0120025	plasma membrane bounded cell projection	6	Pldbra_eH_r1s019g08786	hypothetical_protein_PBRA_002047	339.9224	434.8418	260.1893	401.3144
CC	GO:0120025	plasma membrane bounded cell projection	6	Pldbra_eH_r1s021g09268	cytoplasmic_FMR1-interacting_1_homolog	261.6926	331.1906	203.5207	295.7896
CC	GO:0005730	nucleolus	7	Pldbra_eH_r1s003g01728	ribosome_biogenesis_BMS1_homolog	275.1834	309.2989	203.6742	304.9228
CC	GO:0005730	nucleolus	7	Pldbra_eH_r1s013g06611	nucleolar_NOP5	359.8564	391.2835	257.8495	405.3555
CC	GO:0005730	nucleolus	7	Pldbra_eH_r1s015g07561	eukaryotic_rRNA_processing	293.7115	293.4901	197.1922	323.1065
CC	GO:0005730	nucleolus	7	Pldbra_eH_r1s016g07890	unconventional_myosin-VIIa_isoform_X2	111.91878	150.23054	93.31825	143.64262
CC	GO:0005730	nucleolus	7	Pldbra_eH_r1s018g08642	peptidylprolyl_cis-trans_FKBP-type_domain_containing	483.0791	579.9841	452.1255	664.0158
CC	GO:0005730	nucleolus	7	Pldbra_eH_r1s021g09305	nucleolar_56-like	549.3704	617.6538	369.1916	639.3747
CC	GO:0005730	nucleolus	7	Pldbra_eH_r1s022g09473	hypothetical_protein_PBRA_005952	135.9575	143.6326	109.0815	148.1058
CC	GO:0030286	dynein complex	4	Pldbra_eH_r1s001g00021	sporangia_induced_dynein_heavy_chain	99.53773	148.38009	99.0225	138.13832
CC	GO:0030286	dynein complex	4	Pldbra_eH_r1s002g00945	dynein_heavy_chain	361.5558	480.3879	255.5155	445.772
CC	GO:0030286	dynein complex	4	Pldbra_eH_r1s012g06374	dynein_heavy_chain	122.08293	167.91741	85.03599	146.1115
CC	GO:0030286	dynein complex	4	Pldbra_eH_r1s019g08786	hypothetical_protein_PBRA_002047	339.9224	434.8418	260.1893	401.3144
CC	GO:0045298	tubulin complex	7	Pldbra_eH_r1s001g00472	kinesin-II_95_kDa_subunit-like	42.92766	44.55869	30.01177	48.32645
CC	GO:0045298	tubulin complex	7	Pldbra_eH_r1s011g06038	Katanin_p60_ATPase-containing_subunit_A-like	101.08518	93.24314	70.99399	93.60411
CC	GO:0045298	tubulin complex	7	Pldbra_eH_r1s011g06111	kinesin_family_member_3B	64.58478	76.94789	58.95341	81.39925
CC	GO:0045298	tubulin complex	7	Pldbra_eH_r1s012g06267	hypothetical_protein_PBRA_004927	60.54464	61.39965	35.2168	55.21601
CC	GO:0045298	tubulin complex	7	Pldbra_eH_r1s015g07419	motor_domain-containing	91.10568	96.20659	42.3887	93.37256
CC	GO:0045298	tubulin complex	7	Pldbra_eH_r1s016g07890	unconventional_myosin-VIIa_isoform_X2	111.91878	150.23054	93.31825	143.64262
CC	GO:0045298	tubulin complex	7	Pldbra_eH_r1s035g11650	kinesin_KIN-5A	134.2809	152.0596	118.0152	165.1471
CC	GO:0005874	microtubule	13	Pldbra_eH_r1s001g00021	sporangia_induced_dynein_heavy_chain	99.53773	148.38009	99.0225	138.13832
CC	GO:0005874	microtubule	13	Pldbra_eH_r1s001g00472	kinesin-II_95_kDa_subunit-like	42.92766	44.55869	30.01177	48.32645
CC	GO:0005874	microtubule	13	Pldbra_eH_r1s002g00945	dynein_heavy_chain	361.5558	480.3879	255.5155	445.772
CC	GO:0005874	microtubule	13	Pldbra_eH_r1s011g06038	Katanin_p60_ATPase-containing_subunit_A-like	101.08518	93.24314	70.99399	93.60411
CC	GO:0005874	microtubule	13	Pldbra_eH_r1s011g06111	kinesin_family_member_3B	64.58478	76.94789	58.95341	81.39925
CC	GO:0005874	microtubule	13	Pldbra_eH_r1s012g06267	hypothetical_protein_PBRA_004927	60.54464	61.39965	35.2168	55.21601
CC	GO:0005874	microtubule	13	Pldbra_eH_r1s012g06374	dynein_heavy_chain	122.08293	167.91741	85.03599	146.1115
CC	GO:0005874	microtubule	13	Pldbra_eH_r1s015g07419	motor_domain-containing	91.10568	96.20659	42.3887	93.37256
CC	GO:0005874	microtubule	13	Pldbra_eH_r1s016g07890	unconventional_myosin-VIIa_isoform_X2	111.91878	150.23054	93.31825	143.64262
CC	GO:0005874	microtubule	13	Pldbra_eH_r1s018g08474	tubulin_beta	85.2704	106.15167	73.56227	99.24196
CC	GO:0005874	microtubule	13	Pldbra_eH_r1s019g08786	hypothetical_protein_PBRA_002047	339.9224	434.8418	260.1893	401.3144
CC	GO:0005874	microtubule	13	Pldbra_eH_r1s024g09938	targeting_for_Xklp2_homolog	290.9445	323.3301	217.0371	326.1281
CC	GO:0005874	microtubule	13	Pldbra_eH_r1s035g11650	kinesin_KIN-5A	134.2809	152.0596	118.0152	165.1471
MF	GO:0051082	unfolded protein binding	3	Pldbra_eH_r1s003g01626	heat_shock_80	5065.998	6962.562	4946.573	7888.971
MF	GO:0051082	unfolded protein binding	3	Pldbra_eH_r1s004g02319	calreticulin_precursor	526.9396	477.7549	358.7766	517.0088
MF	GO:0051082	unfolded protein binding	3	Pldbra_eH_r1s021g09213	molecular_chaperone	908.9307	1148.373	958.2634	1269.5917
MF	GO:0090482	vitamin transmembrane transporter activity	2	Pldbra_eH_r1s002g00828	hypothetical_protein_PBRA_005136	271.6475	231.5417	482.5417	326.91
MF	GO:0090482	vitamin transmembrane transporter activity	2	Pldbra_eH_r1s002g00829	hypothetical_protein_PBRA_005137	49.06167	34.18932	76.23376	47.97423
MF	GO:0003779	actin binding	4	Pldbra_eH_r1s004g02472	WH1_domain_containing	60.58399	78.60085	65.92309	85.00628
MF	GO:0003779	actin binding	4	Pldbra_eH_r1s006g03520	probable_profilin	270.4378	214.7678	276.772	209.1427
MF	GO:0003779	actin binding	4	Pldbra_eH_r1s010g05463	hypothetical_protein_PBRA_000937	138.86714	155.89036	83.55141	134.81919
MF	GO:0003779	actin binding	4	Pldbra_eH_r1s016g07890	unconventional_myosin-VIIa_isoform_X2	111.91878	150.23054	93.31825	143.64262
MF	GO:0005245	voltage-gated calcium channel activity	2	Pldbra_eH_r1s004g02391	hypothetical_protein_PBRA_003307	25.75107	31.62514	16.38552	29.41019
MF	GO:0005245	voltage-gated calcium channel activity	2	Pldbra_eH_r1s008g04638	two_pore_calcium_channel_2-like	7.143215	5.622293	4.443868	1.348649
MF	GO:0030515	snoRNA binding	2	Pldbra_eH_r1s013g06611	nucleolar_NOP5	359.8564	391.2835	257.8495	405.3555
MF	GO:0030515	snoRNA binding	2	Pldbra_eH_r1s021g09305	nucleolar_56-like	549.3704	617.6538	369.1916	639.3747
MF	GO:0008017	microtubule binding	7	Pldbra_eH_r1s001g00472	kinesin-II_95_kDa_subunit-like	42.92766	44.55869	30.01177	48.32645
MF	GO:0008017	microtubule binding	7	Pldbra_eH_r1s011g06038	Katanin_p60_ATPase-containing_subunit_A-like	101.08518	93.24314	70.99399	93.60411
MF	GO:0008017	microtubule binding	7	Pldbra_eH_r1s011g06111	kinesin_family_member_3B	64.58478	76.94789	58.95341	81.39925
MF	GO:0008017	microtubule binding	7	Pldbra_eH_r1s012g06267	hypothetical_protein_PBRA_004927	60.54464	61.39965	35.2168	55.21601
MF	GO:0008017	microtubule binding	7	Pldbra_eH_r1s015g07419	motor_domain-containing	91.10568	96.20659	42.3887	93.37256
MF	GO:0008017	microtubule binding	7	Pldbra_eH_r1s016g07890	unconventional_myosin-VIIa_isoform_X2	111.91878	150.23054	93.31825	143.64262
MF	GO:0008017	microtubule binding	7	Pldbra_eH_r1s035g11650	kinesin_KIN-5A	134.2809	152.0596	118.0152	165.1471
MF	GO:0016887	ATPase activity	12	Pldbra_eH_r1s001g00021	sporangia_induced_dynein_heavy_chain	99.53773	148.38009	99.0225	138.13832
MF	GO:0016887	ATPase activity	12	Pldbra_eH_r1s001g00472	kinesin-II_95_kDa_subunit-like	42.92766	44.55869	30.01177	48.32645
MF	GO:0016887	ATPase activity	12	Pldbra_eH_r1s002g00945	dynein_heavy_chain	361.5558	480.3879	255.5155	445.772
MF	GO:0016887	ATPase activity	12	Pldbra_eH_r1s006g03420	probable_pre-mRNA-splicing_factor_ATP-dependent_RNA_helicase_DEAH5	209.1934	263.2773	182.5153	239.0728
MF	GO:0016887	ATPase activity	12	Pldbra_eH_r1s011g06038	Katanin_p60_ATPase-containing_subunit_A-like	101.08518	93.24314	70.99399	93.60411
MF	GO:0016887	ATPase activity	12	Pldbra_eH_r1s011g06111	kinesin_family_member_3B	64.58478	76.94789	58.95341	81.39925
MF	GO:0016887	ATPase activity	12	Pldbra_eH_r1s012g06374	dynein_heavy_chain	122.08293	167.91741	85.03599	146.1115
MF	GO:0016887	ATPase activity	12	Pldbra_eH_r1s013g06916	ATP-dependent_permease	10.479758	16.231467	10.539309	2.939277
MF	GO:0016887	ATPase activity	12	Pldbra_eH_r1s019g08786	hypothetical_protein_PBRA_002047	339.9224	434.8418	260.1893	401.3144
MF	GO:0016887	ATPase activity	12	Pldbra_eH_r1s022g09557	PEP_carboxykinase	39.29836	56.70386	45.533	69.13093
MF	GO:0016887	ATPase activity	12	Pldbra_eH_r1s028g10814	ABC_transporter	7.225335	5.445421	5.086755	1.199373
MF	GO:0016887	ATPase activity	12	Pldbra_eH_r1s033g11492	DNA_replication_licensing_factor_MCM3	275.1997	298.7308	213.7808	294.389
MF	GO:0003777	microtubule motor activity	10	Pldbra_eH_r1s001g00021	sporangia_induced_dynein_heavy_chain	99.53773	148.38009	99.0225	138.13832
MF	GO:0003777	microtubule motor activity	10	Pldbra_eH_r1s001g00472	kinesin-II_95_kDa_subunit-like	42.92766	44.55869	30.01177	48.32645
MF	GO:0003777	microtubule motor activity	10	Pldbra_eH_r1s002g00945	dynein_heavy_chain	361.5558	480.3879	255.5155	445.772
MF	GO:0003777	microtubule motor activity	10	Pldbra_eH_r1s011g06111	kinesin_family_member_3B	64.58478	76.94789	58.95341	81.39925
MF	GO:0003777	microtubule motor activity	10	Pldbra_eH_r1s012g06267	hypothetical_protein_PBRA_004927	60.54464	61.39965	35.2168	55.21601
MF	GO:0003777	microtubule motor activity	10	Pldbra_eH_r1s012g06374	dynein_heavy_chain	122.08293	167.91741	85.03599	146.1115
MF	GO:0003777	microtubule motor activity	10	Pldbra_eH_r1s015g07419	motor_domain-containing	91.10568	96.20659	42.3887	93.37256
MF	GO:0003777	microtubule motor activity	10	Pldbra_eH_r1s016g07890	unconventional_myosin-VIIa_isoform_X2	111.91878	150.23054	93.31825	143.64262
MF	GO:0003777	microtubule motor activity	10	Pldbra_eH_r1s019g08786	hypothetical_protein_PBRA_002047	339.9224	434.8418	260.1893	401.3144
MF	GO:0003777	microtubule motor activity	10	Pldbra_eH_r1s035g11650	kinesin_KIN-5A	134.2809	152.0596	118.0152	165.1471
